# Supplementary material for: Production of 1,2-propanediol from fructose over a biochar-supported RuWCu catalyst
Source: Royal Society of Chemistry journal article supplement (doi:10.1039/d3se00997a), 2023-01-01
Supplement: d3se00997a1.pdf [file d3se00997a1.pdf]

## Supplementary Material

### Production of 1,2-propanediol from fructose over biochar-supported RuWCu catalyst

Yong Liu,<sup>1</sup> Lungang Chen,<sup>2\*</sup> Dongfeng Chi,<sup>3,4</sup> Chenguang Wang,<sup>1,4</sup> Xinghua Zhang,<sup>2</sup> Jianguo Liu,<sup>2</sup> Qi Zhang,<sup>2</sup> Longlong Ma<sup>2</sup>

1. School of Resources & Environment and Key Laboratory of Poyang Lake Environment and Resource Utilization, Ministry of Education, Nanchang University, Nanchang 330031, PR China;
2. Key Laboratory of Energy Thermal Conversion and Control of Ministry of Education, School of Energy and Environment, Southeast University, Nanjing 210096, PR China;
3. Nano Science and Technology Institute, University of Science and Technology of China, Suzhou 215123, PR China;
4. Key Laboratory of Renewable Energy, Guangzhou Institute of Energy Conversion, Chinese Academy of Sciences, Guangzhou 510640, PR China.

Corresponding Author: chenlg@seu.edu.cn

**Table S1** Metal loadings in various catalysts.

| Entry | Catalyst                                                   | Theoretical metal (%) |    |    | Actual metal (%) |       |      |
|-------|------------------------------------------------------------|-----------------------|----|----|------------------|-------|------|
|       |                                                            | Ru                    | W  | Cu | Ru               | W     | Cu   |
| 1     | Ru <sub>0.5</sub> W <sub>24</sub> Cu <sub>5</sub> /biochar | 0.5                   | 24 | 5  | 0.24             | 21.54 | 3.84 |
| 2     | Ru <sub>1</sub> W <sub>24</sub> Cu <sub>5</sub> /biochar   | 1                     | 24 | 5  | 0.68             | 22.47 | 3.58 |
| 3     | Ru <sub>2</sub> W <sub>24</sub> Cu <sub>5</sub> /biochar   | 2                     | 24 | 5  | 1.55             | 20.55 | 4.02 |
| 4     | Ru <sub>3</sub> W <sub>24</sub> Cu <sub>5</sub> /biochar   | 3                     | 24 | 5  | 2.71             | 18.35 | 3.94 |
| 5     | Ru <sub>5</sub> W <sub>24</sub> Cu <sub>5</sub> /biochar   | 5                     | 24 | 5  | 4.32             | 20.14 | 3.75 |
| 6     | Ru <sub>3</sub> W <sub>36</sub> Cu <sub>5</sub> /biochar   | 3                     | 36 | 5  | 2.46             | 29.75 | 3.69 |
| 7     | Ru <sub>0.5</sub> W <sub>36</sub> Cu <sub>7</sub> /biochar | 0.5                   | 36 | 7  | 0.34             | 30.02 | 5.97 |

**Table S2** Physical properties of Ru<sub>0.5</sub>W<sub>35</sub>Cu<sub>7</sub>/biochar calcinated at various temperatures.

| Catalyst                                                   | Calcination Temperature (°C) | $S_{BET}$ (m <sup>2</sup> g <sup>-1</sup> ) | $V_p$ (cm <sup>3</sup> g <sup>-1</sup> ) | $d_p$ (nm) |
|------------------------------------------------------------|------------------------------|---------------------------------------------|------------------------------------------|------------|
| Ru <sub>0.5</sub> W <sub>35</sub> Cu <sub>7</sub> /biochar | 300                          | 12.08                                       | 0.030                                    | 1.54       |
| Ru <sub>0.5</sub> W <sub>35</sub> Cu <sub>7</sub> /biochar | 400                          | 16.16                                       | 0.043                                    | 1.56       |
| Ru <sub>0.5</sub> W <sub>35</sub> Cu <sub>7</sub> /biochar | 500                          | 9.72                                        | 0.030                                    | 2.17       |
| Ru <sub>0.5</sub> W <sub>35</sub> Cu <sub>7</sub> /biochar | 600                          | 6.84                                        | 0.018                                    | 1.85       |

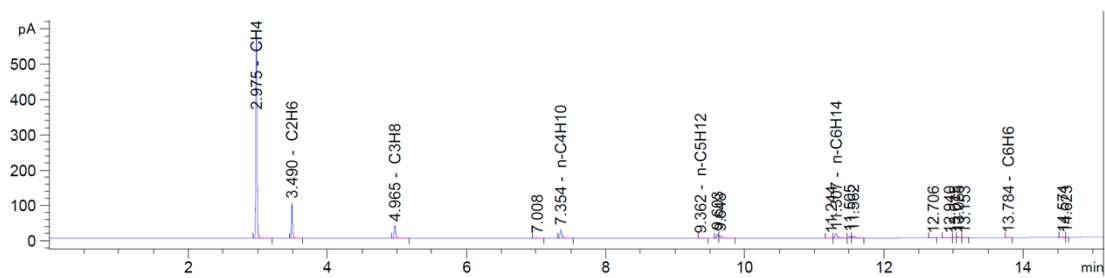

**Fig. S1** GC spectrum of gas-phase products during conversion of fructose to 1,2-PDO.
